# Supplementary material for: Co-Targeting Luminal B Breast Cancer with S-Adenosylmethionine and Immune Checkpoint Inhibitor Reduces Primary Tumor Growth and Progression, and Metastasis to Lungs and Bone
Source: MDPI journal article supplement (doi:10.3390/cancers15010048), 2022-12-22
Supplement: s1 [file s1]

Supplementary Figures

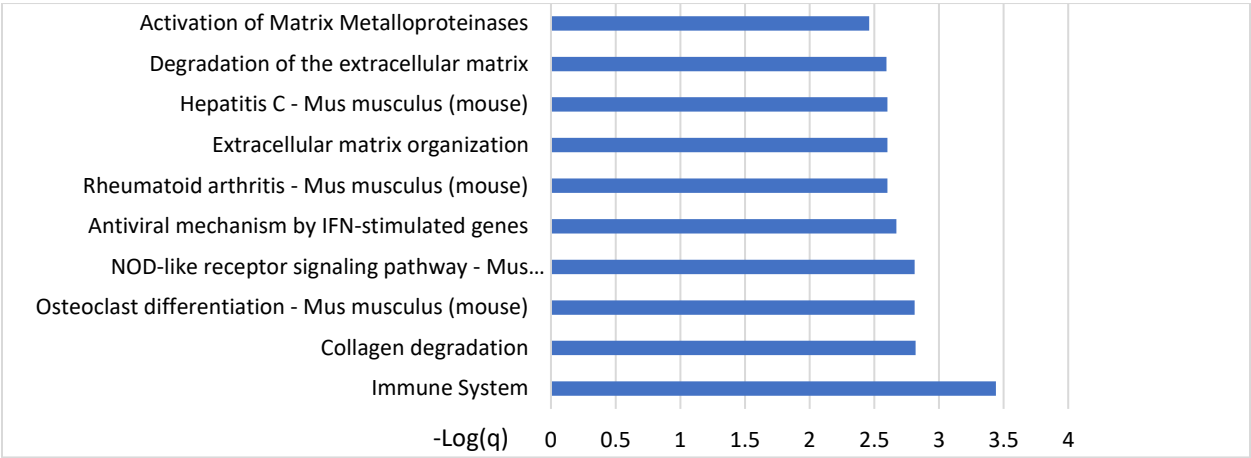

**Supplementary Figure S1:** Top 10 significantly downregulated pathways obtained from downregulated genes in SAM and anti-PD-1 antibody combination treated Eo771 tumors versus control tumors.

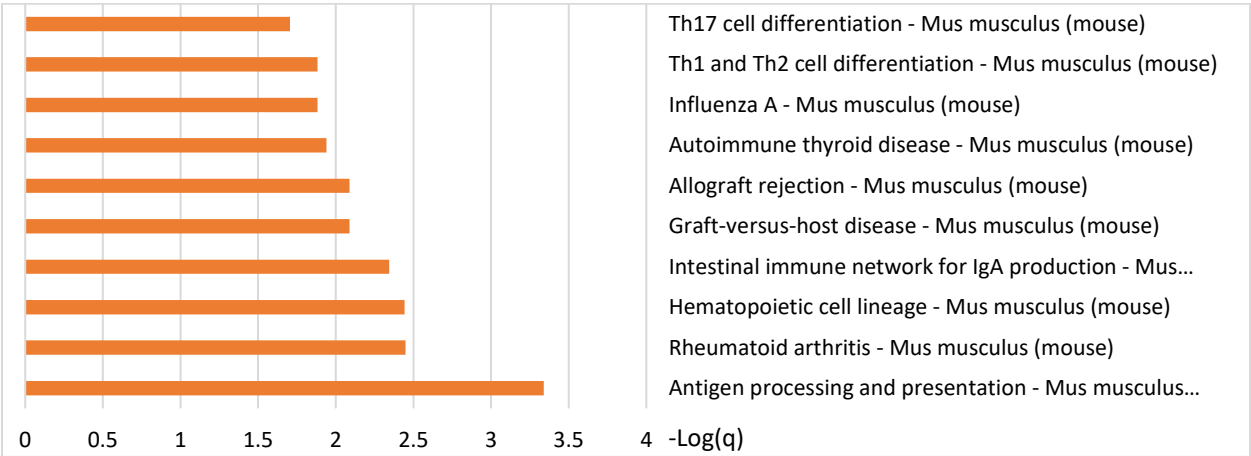

**Supplementary Figure S2:** Top 10 significantly upregulated pathways related to immunity obtained from upregulated genes in SAM and anti-PD-1 antibody combination treated Eo771 tumors versus control tumors.
